# Supplementary material
Source: publisher figshare collection journal article supplement (https://frontiersin.figshare.com/ndownloader/files/26307880)

Schematic of experimental design in the greenhouse

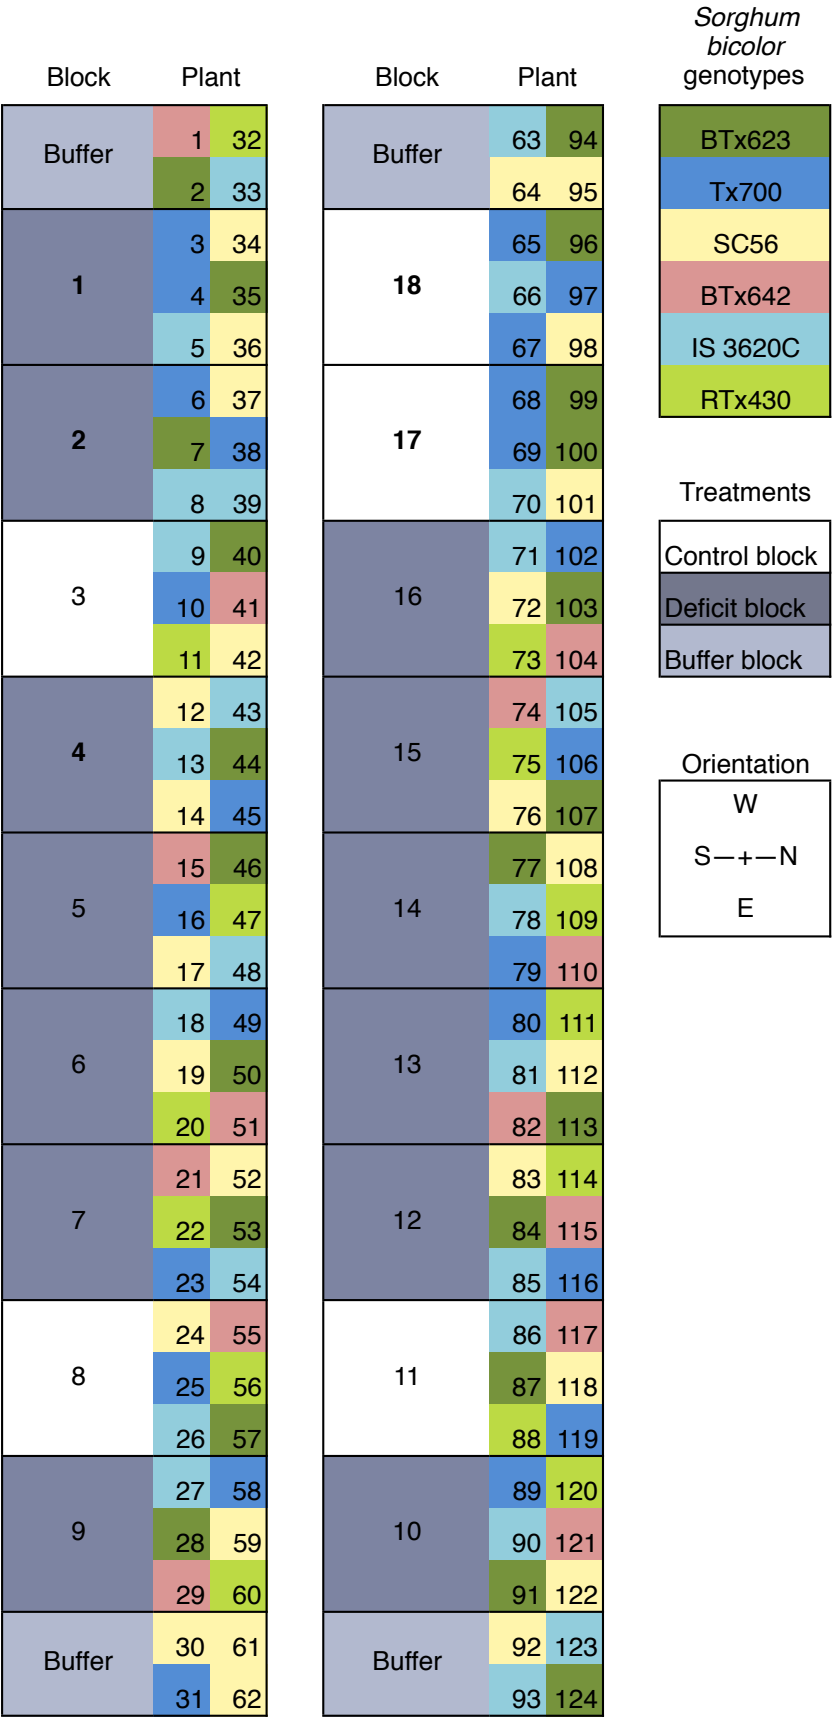

Supplement: Supplementary file [file 26307880]
